# Supplementary material
Source: PubMed Central journal article supplement (PMC7147385)
Supplement: NIHMS1569420-supplement-3.pdf [file NIHMS1569420-supplement-3.pdf]

*car-1* smFISH

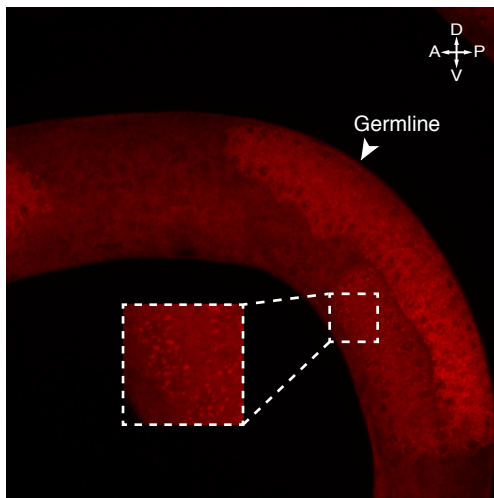

DAPI

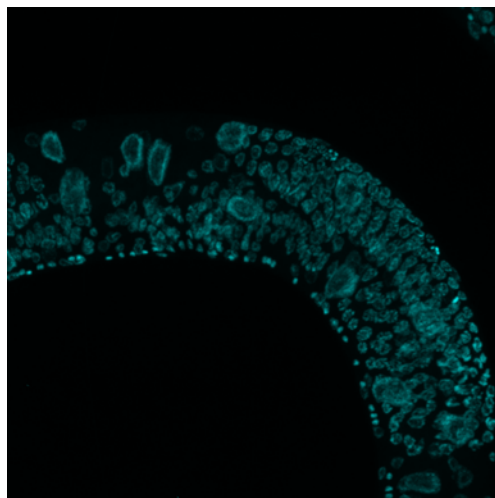

merge

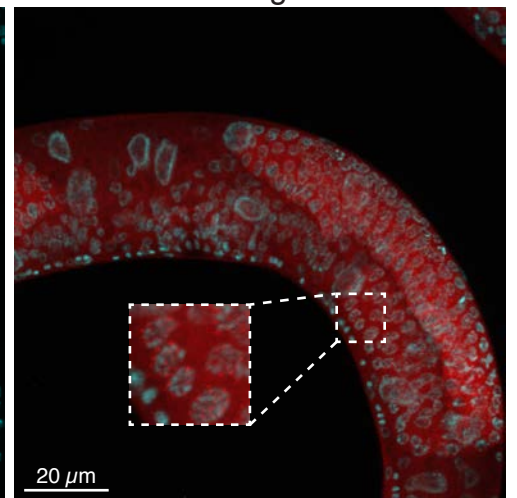

**Figure S1. *car-1* mRNAs are present in the *C. elegans* germline. Related to Figure 1.**

smFISH of *car-1* mRNAs showing cytoplasmic puncta in the germline. DAPI counterstain for DNA. Scale bar, 20  $\mu$ m.

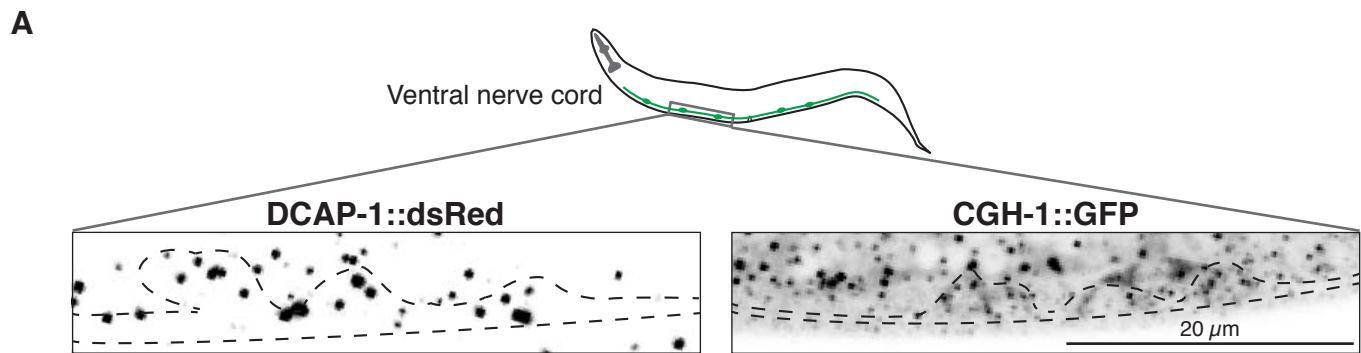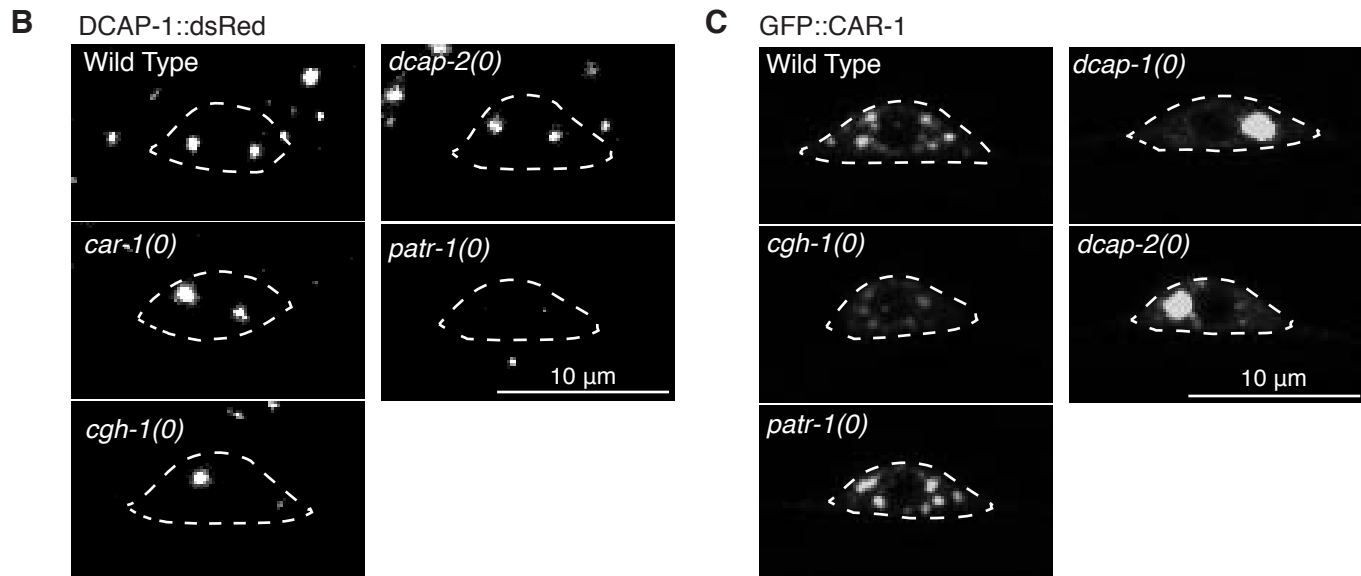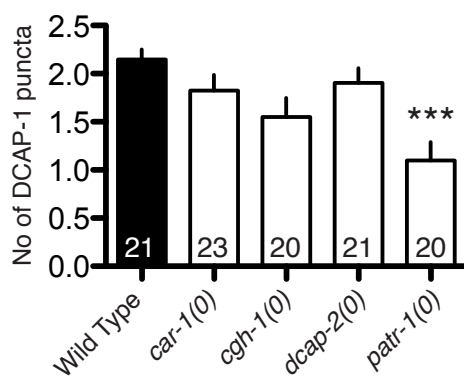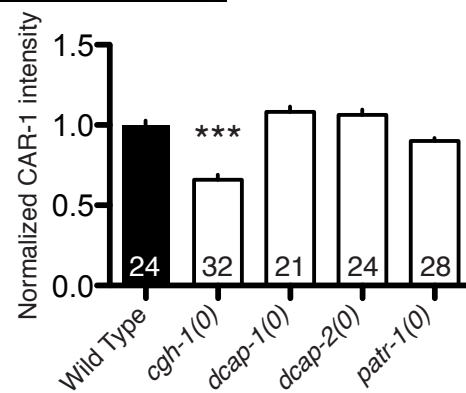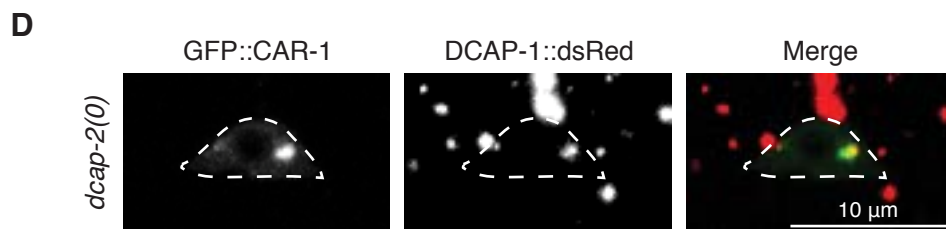

**Figure S2. Localization of DCAP-1 and CAR-1 in mRNA decay mutants. Related to Figure 1.**

- A) Localization of DCAP-1 [*Pdcap-1*-DCAP-1::*dsRed(bpIs37)*] or CGH-1 [*Pcgh-1*-CGH-1::*GFP(dhIs1000)*] within the ventral nerve cord of cholinergic motor neurons (outlined). The cholinergic motor neurons are labeled with *Punc-17*-*GFP(vsls48)* or *Punc-17*-mCherry(*nuls321*). DCAP-1 and CGH-1 showed similar localization in GABAergic motor neurons (not shown). The ventral nerve cord is outlined. Scale bar, 20  $\mu$ m.
- B) Top shows confocal images of DCAP-1::*dsRed(bpIs37)* localization in indicated mRNA decay mutants. Bottom shows quantitation of DCAP-1 puncta in the PLM cell body. Sample size is indicated in the bar.
- C) Top shows confocal images of GFP::*CAR-1 (juSi338)* localization in indicated mRNA decay mutants. Bottom shows quantitation of DCAP-1 puncta in the PLM cell body. Statistics: one-way ANOVA with Bonferroni's post test; \*\*\* $p < 0.001$ .
- D) The loss of *dcap-2* results in accumulation of CAR-1 into enlarged puncta, which colocalizes with the DCAP-1 granules. Scale bar, 10  $\mu$ m.

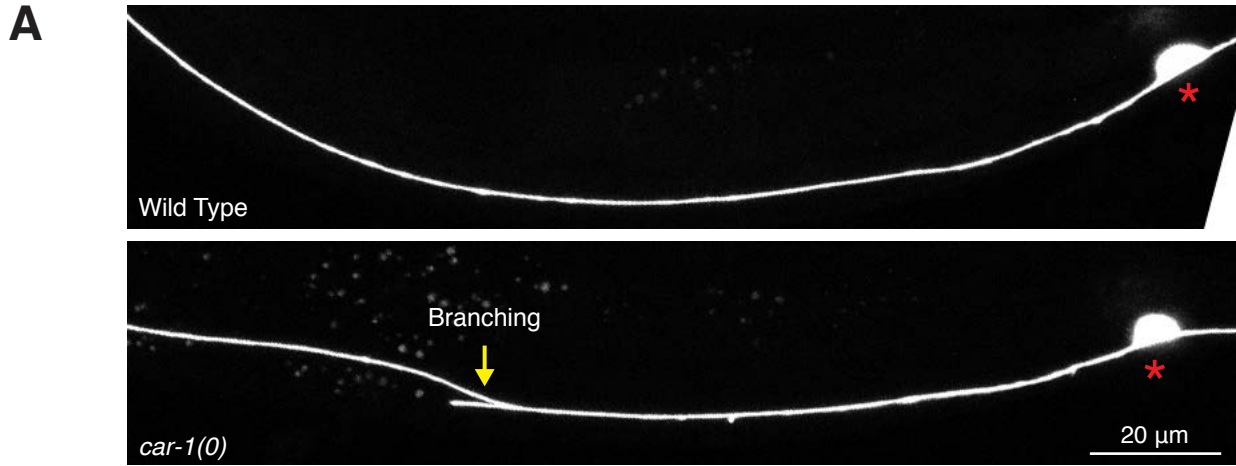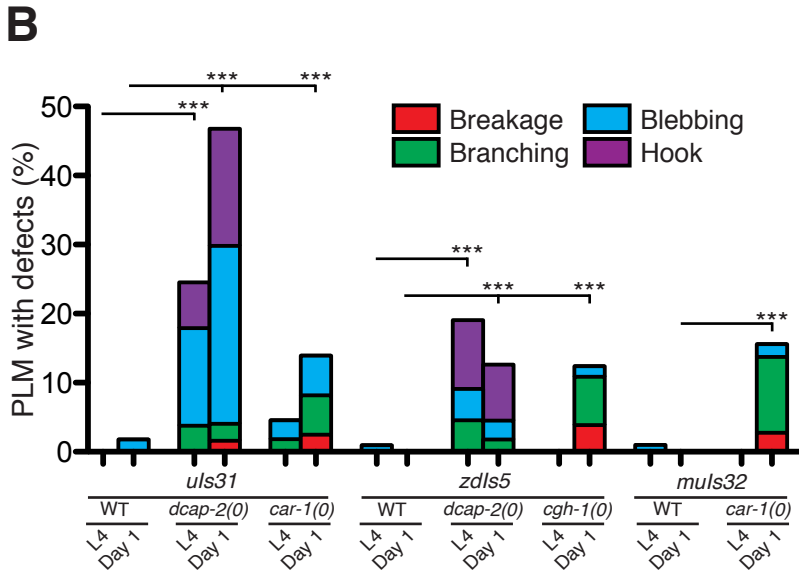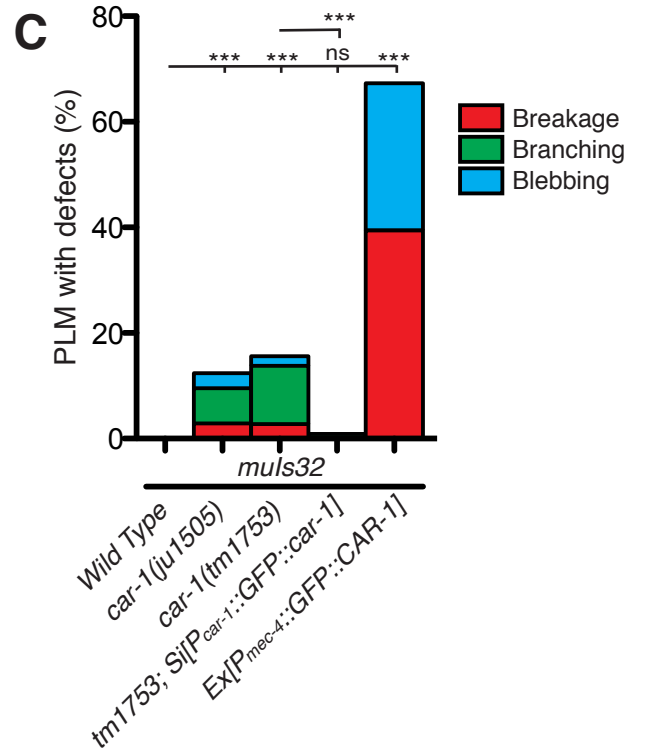

**Figure S3. Re-expression of *car-1* rescues axonal morphology in *car-1(0)* mutants.**

**Related to Figure 2.**

- A) Posterior end of the PLM axons in wild type or *car-1(0)* mutants showing branching phenotype. Red \* marks position of the cell body, yellow arrowhead marks the position of branched axons. Anterior to the left.
- B) Quantification of abnormal PLM phenotypes in wild type and mRNA decay mutants. TRNs were labeled with *Pmec-17-GFP(uls31)*, *Pmec-4-GFP(zdls5)* or *Pmec-7-GFP(muls32)*. N≥100. Statistics: Fisher's exact test; \*\* p<0.01, \*\*\* p<0.001; ns, not significant (P>0.05).
- C) Abnormal PLM morphology of *car-1(0)* mutant was observed using two independent alleles, in two independent transgenic backgrounds (*uls31* and *muls32*). *Pcar-1-GFP::CAR-1(juSi343)* rescued the PLM defects in *car-1(0)* whereas over-expression of CAR-1 (Ex[*Pmec-4::GFP::CAR-1*]) resulted in serious PLM defects. Day 1 adults were observed and quantified. N≥100. Statistics: Fisher's exact test; \*\*\*p<0.001; ns, not significant (P>0.05).

# A

|             |                                                                                                                              |     |
|-------------|------------------------------------------------------------------------------------------------------------------------------|-----|
| Ce_MICU-1   | MLHCSFLRVIPIKNASKRLIIIVRSLTSAPAKTSEAEKQDQSLKNIDAGEKYTALGNIRQKKDVHYHTDRASGVGVSHYSSSVYQHRPFIWPLRKLKLY-----HWNYALVIAGMV-        | 109 |
| Human_MICU1 | -----MFRNLSLSALAEALVAGSRWYHGGSQPIQIR-----RRLLM-----MVAFLGASAV-                                                               | 44  |
| Ce_C56A3.6  | -----MNRVLSRFWGFSTKHRQHIL                                                                                                    | 20  |
| Human_MICU2 | -----MAAAAGSC-----ARVAAWGKLRRLGLAVS                                                                                          | 25  |
| Human_MICU3 | -----MAALRRLWPPRVPSPPLCAHQPLLGPWGRPAVTTLGLP                                                                                  | 39  |
| Ce_MICU-1   | -----ILMSDFEWLKDQIK-----SASLP--FRPE----ASQKE--EV-T--ESNGEVEVKEKPKKKKLGFRERRI IEYE-DRLRLYSTPDKIFRYFATL                        | 188 |
| Human_MICU1 | -----TASTGLLWKRAHAE-----SPPCVDNLKSDIGDKGNKDEGDV-CNHEKKTADLAPHPEEKKKRSRGRDRKVMYEY-NRIRAYSTPDKIFRYFATL                         | 134 |
| Ce_C56A3.6  | NQRIVERTS-----ARNAVLT-AAAGIGTSIGAYQLIDTARAGILDGS-----DDASRHNVTTDHKLTKRELRFQFASV                                              | 89  |
| Human_MICU2 | RQAVR-----SPGPL-----AAVAGALAGAGAAWHHS-----RVSVAAADGSGFTVSAQKNVEHGI IYIGKPSLRKQRFMQFSSL                                       | 96  |
| Human_MICU3 | GRPFSSREDEERAVAEAAWRRRRRWGELSVAAAAGGLVGLVYQLYGDPAGSPATGRPSKSAATEPEDPPRGRGMLPIPVAAKETVAI-GRTDIEDLDLY---ATSRERRRRLFASII        | 155 |
| Ce_MICU-1   | KIIDPNEDSGRFEVFMTPEDFLRSFTPGVMQPRRWGLDSFKNYN----PEKHKRHKFSDDPS IFYKLGENGLINFSDYFLFMTLLSTSHADFALAFKIFDVGNGALDKEEFTKQVQQLIM    | 304 |
| Human_MICU1 | KVIS---EPGEAEVFMTPEDFVRSITPNEKQPEHLGDQYIIKRFDGKKISQEREKFADEGS IFYTLGECGLISFSDYIFLTTVLS TPQRNFE IAFKMFDLNGDGEVDMEEFEVQVQSIIR  | 251 |
| Ce_C56A3.6  | E-----YDDVIYMSPMDFIDSLTLDAPRERVYRR-VLKEKDI-QRILKKTTPFRSGGKHFFRTMDQSGI ISYSEYIFLLTLLTKSKAAPRIAF LMFDEDDNGNIDRDEFMLIRSLTS      | 199 |
| Human_MICU2 | E-----HEGEYMTPRDFLFVSMFQEMERKTSVK-KLTKKDI-EDTLGGIQTAA-CGSGTFRDLGDKGLISYTYEYLFLLTILTKPHSGFHFVAFKMLD TDGNEMIEKREFFKQKIIIS      | 205 |
| Human_MICU3 | E-----CEGQLFMTYPDYILAVTTDEPKVAKTWK-SLSKQEL-NQMLAETPPVWKGSKLFRNLKEKGVISYTYEYLFLLCILT KPHAGFR IAFNMFD TDGNEMVDDKKEFLVLQEIIFR   | 265 |
| Ce_MICU-1   | SQTTVGQRHRDHITP-----N-----QSFVETNSALETYFFGKDGKGSLSSEKFI EFQERLQHDILK                                                         | 362 |
| Human_MICU1 | SQTSMGMRHRDRPTT-----G-----NLTSGKLSALTYFFGADLKGKLTIKNFLEFQRKQHDVLK                                                            | 309 |
| Ce_C56A3.6  | SLRSTTRVQPSTASDEEDRRESCQLDAADYHFVAFSRI---GADRLFTGADSYAVMFTIARMFASKAATLSGTRLVHKSEEEVVRKQDTLLLLHLFGRGNATLSFDEFQOQYENLQEEELME   | 316 |
| Human_MICU2 | KQDDLMTVK-----TNET-----GYQE-----AIVKEPEINTTLMRFFGKRGQRKLHYKEFRFRFMENLQTEIQE                                                  | 265 |
| Human_MICU3 | KKNEKREIK-----GDEEKRAMRLQLYGYHSPNSVLKTDABEELVS---RSYW---DTLRR---NTSQALFSDLAERADDITSLVTD TLLVHFPGKKAELNFPDFYRMDNLQTEVLE       | 373 |
| Ce_MICU-1   | MEFERRDALDNPGLINEDSFAQLLLLHAQINEKQKHM LKRVKRRFKGENLKGISFGETKAPFFELYHIDDVDIALHFHKMAGMS IDAKLLQRVAVKVTGIP LSDHVVDVVITLFDNDL    | 482 |
| Human_MICU1 | LEFERHDPV---DGRITERQFGGMLLAYSGVQSKL TAMQRQLKHKHFK--GKGLTFQEVENFFFLKNINDVD TALSFYHMAGASLDKVTM QQVARTVARVELSDHVCVVFALFDCDG     | 424 |
| Ce_C56A3.6  | IEFYEFPA---RGKTAISPVD FARILLRYSIVNFDDYHKYLQRVQE--KSDDEE PGISLSQWATFSRFLNNALEFQSAVRLYVNSNVPVSEPEFARAVGCTIGKELDPVVVSMIFRIFDENN | 432 |
| Human_MICU2 | MEFLQFS---KGLSFMRKEDFAEWLLFFNTNEN--KDIYWKNVRE--KLSAGESISLDEFKSFCHFTTHLEDFALAMQMFSLAHRPVRLAEFKRAVKVATGQELSNLLD TVKIFDLDG      | 378 |
| Human_MICU3 | IEFLSYS---NGMNTISEEDFAHILLRYTNVEN--TSVLENVRY--SIPEEKGITDFEFSFFQFLNNLEDFALALNMYNFASRS IQDEFKRAVYVATGLKFSPHLVNTVFKIFDVDK       | 486 |
| Ce_MICU-1   | DGKLSHEEMVAVMRRRRRGLERPRDTGLFRLFDVAVLECGKRAYHASPLPFY-----                                                                    | 534 |
| Human_MICU1 | NGELSNKEFVSIKQRLRMGLEPKDMGFTRLMQAMWKAQETAWDFALPKQ-----                                                                       | 476 |
| Ce_C56A3.6  | DGTLSYPEPLAVMSDRDLHRGLRGRLEKP---WGKPFKNCVISEVSR-----                                                                         | 477 |
| Human_MICU2 | DECLSHEEPLGLVKNRMRGLWVPOH---QSIQEYWKCVKESIKRGVKEVWQAGKGLF                                                                    | 434 |
| Human_MICU3 | DDQLSYKEFIGIMKDRDLHRGFRGYKT-V---QKYPTFKSCLKKELHSR-----                                                                       | 530 |

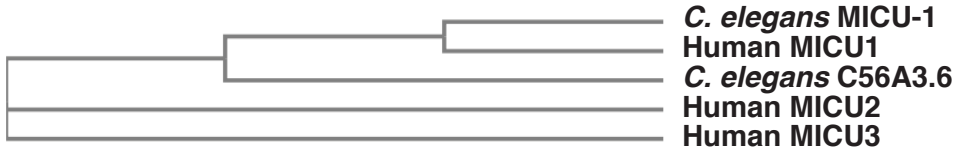

# B MICU-1::GFP(*ju1783*)

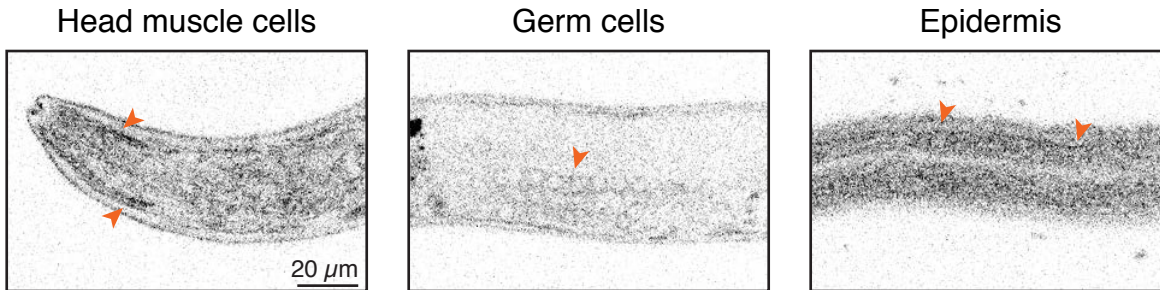

**Figure S4. *C. elegans* MICU proteins are related to mammalian MICU. Related to Figure 6.**

- A) Multiple protein sequence alignment and phylogenetic tree for MICU1 family proteins. Accession numbers: *C. elegans* MICU-1 isoform D (Q95PZ2), Human MICU1 (Q9BPX6), *C. elegans* C56A3.6 (Q18874), human MICU2 (Q8IYU8), human MICU3 (Q86XE3). Sequence alignment and phylogenetic tree were generated using ClustalOmega (<http://www.ebi.ac.uk/Tools/msa/clustalo/>) with default settings. Among human MICU family members, MICU1 is closest to *C. elegans* MICU-1; MICU2 and MICU3 are equally related to C56A3.6.
- B) Representative confocal images of endogenous MICU-1::GFP(*ju1783*) in head muscles, germ cells and the epidermis.



**A**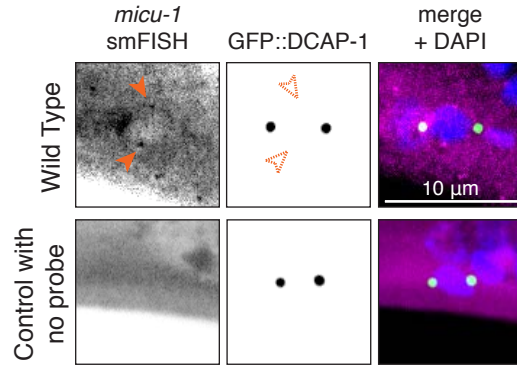**B**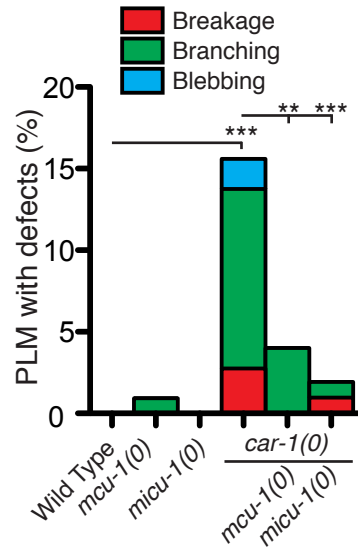**C**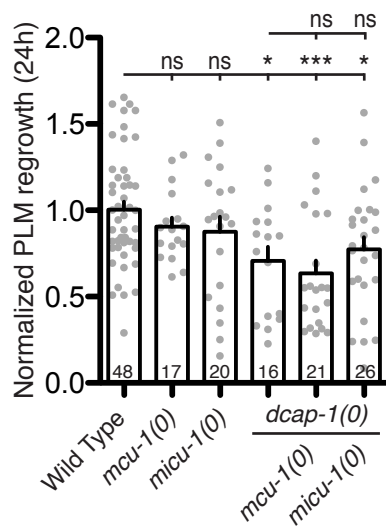**D**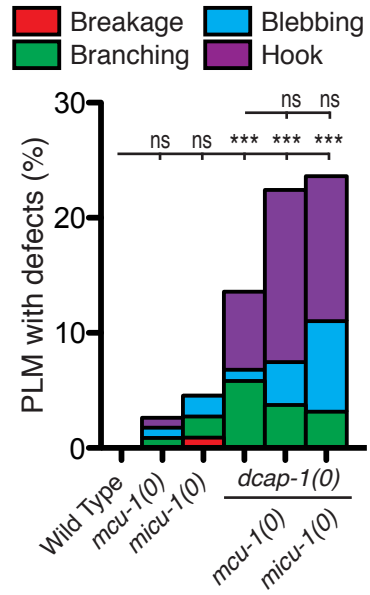

**Figure S5. Loss of *mcu-1* or *micu-1* does not suppress *dcap-1(0)* phenotypes.**

**Related to Figure 6 and 7.**

- A) smFISH of *micu-1* mRNA. *micu-1* mRNAs do not colocalize with GFP::DCAP-1 expressed in TRNs [*Pmec-4-GFP::DCAP-1(juEx8024)*].
- B) Abnormal PLM morphology of *car-1(0)* mutant is rescued by deletion of *mcu-1* or *micu-1*. N≥100. Statistics: Fisher's exact test; \*\*p<0.01; \*\*\*p<0.001.
- C) Reduced axon regrowth in *dcap-1(0)* mutant is not rescued by deletion of *mcu-1* or *micu-1*. Statistics: one-way ANOVA with Bonferroni's posttest; \*p<0.05; \*\*\*p<0.001; ns, not significant. Sample size is indicated in the bar.
- D) Abnormal PLM morphology of *dcap-1(0)* mutant is not rescued by deletion of *mcu-1* or *micu-1*. N≥100. Statistics: Fisher's exact test; \*\*\*p<0.001; ns, not significant.

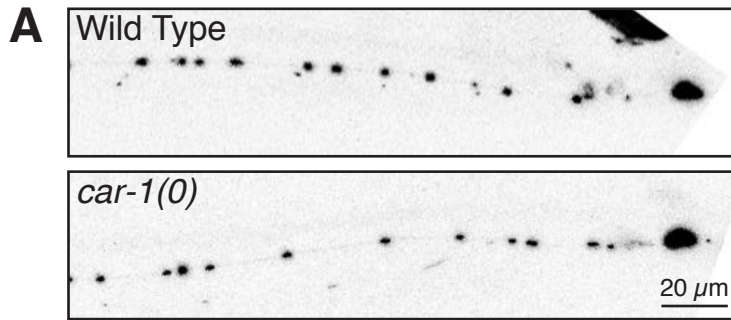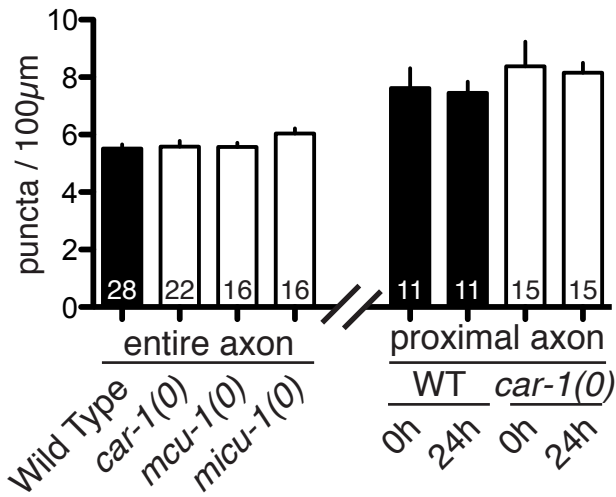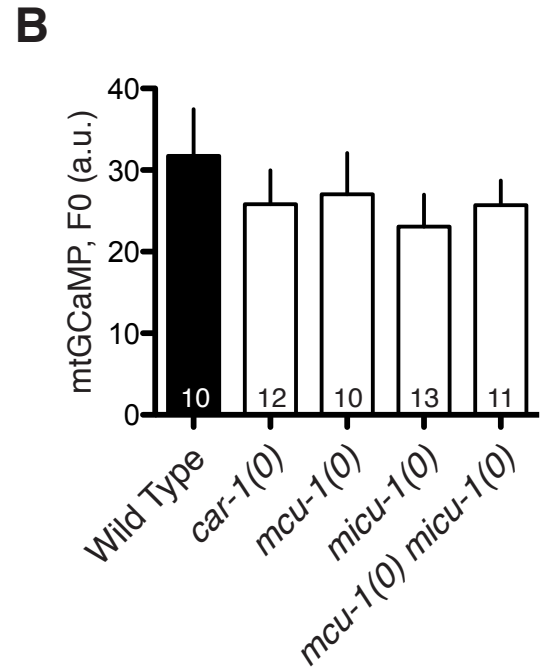

**Figure S6. *car-1*, *mcu-1*, and *micu-1* mutants display normal axonal mitochondrial distribution and baseline  $[Ca^{2+}]_{mt}$ . Related to Figure 7.**

- A) Mitochondria density in PLM neurons was not affected in *car-1(0)*, *mcu-1(0)* and *micu-1(0)* mutants. Top shows representative images of mitochondria localization [P*mec-7*-tagRFP::mito(*jsIs1073*)] in PLM neurons in wild type and *car-1(0)*. Bottom shows quantification of mitochondria puncta in PLM neurons in the entire uninjured axon (left), or proximal axon (right) at 0 h or 24 h post-axotomy. Sample size is indicated in the bar.
- B) Baseline levels of mito-GCaMP (F0) in different mutants before axotomy. Sample size is indicated in the bar.

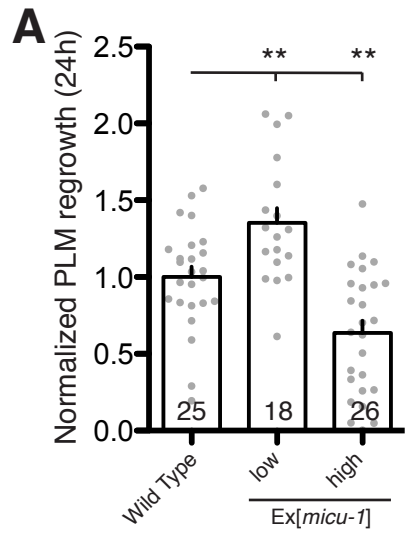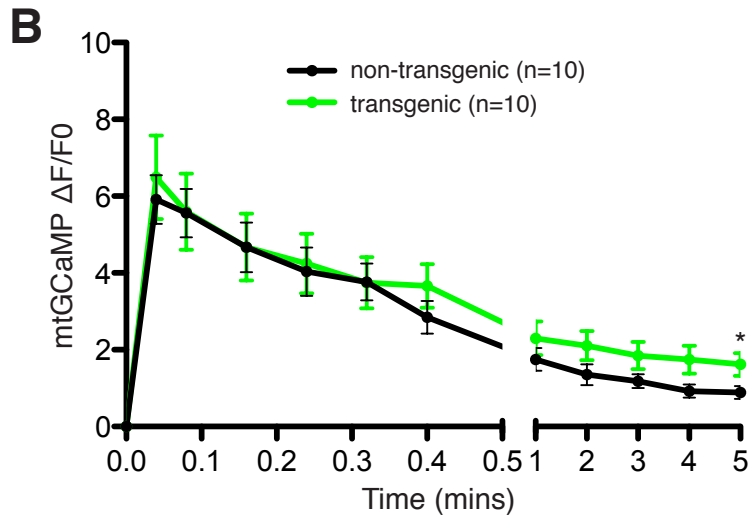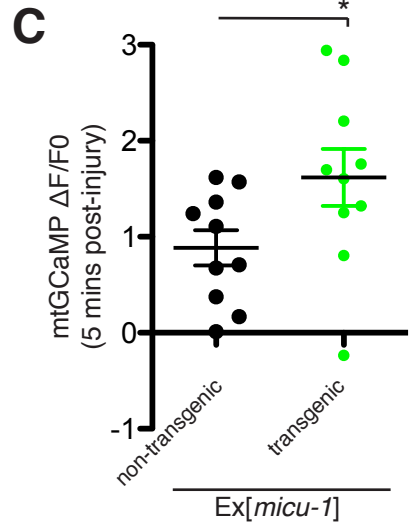

**Figure S7. Overexpression of *micu-1* phenocopies *car-1(0)* mutants in axon regrowth. Related to Figure 7.**

A) Slight overexpression of *micu-1* (2ng/ $\mu$ l, *juEx8048*) results in increased PLM axon regrowth, whereas high overexpression of *micu-1* (10ng/ $\mu$ l, *juEx8050*) results in decreased PLM axon regrowth. Bars indicate mean  $\pm$  SEM. Statistics: one-way ANOVA with Bonferroni's post test; \*\* $p < 0.01$ .

B) mtGCaMP fluorescence intensity ( $\Delta F/F_0$ ) over 5 minutes post-axotomy. Transgenic animals (*juEx8048*) show sustained  $[Ca^{2+}]_{mt}$  uptake upon axon injury. Non-transgenic animals are siblings from the same strain. Statistics: Unpaired t-test against non-transgenic animals; \* $p < 0.05$ .

C) mtGCaMP fluorescence intensity ( $\Delta F/F_0$ ) at 5 minutes post-axotomy in genotypes indicated. Each dot represents a mtGCaMP in an animal. Statistics: Unpaired t-test; \* $p < 0.05$ .

| <b>Gene name</b> | <b>Allele number</b> | <b>Breakpoints/Mutations</b>                                                    |
|------------------|----------------------|---------------------------------------------------------------------------------|
| <i>car-1</i>     | <i>ju1505</i>        | AGTTTGAGCTTACCT...(698bp deletion+9bp insertion)...GTCGTGATGATGTC               |
| <i>car-1</i>     | <i>ju1506</i>        | TTTTCGTTATTTTTT... (1110bp deletion) ...CCGTTAGGCCAAATC                         |
| <i>micu-1</i>    | <i>ju1155</i>        | CGTTGATAAATCGACCGCGT...(1001bp deletion+218bp insertion)...ACAGTGGACGCTTTGAAGTT |
| <i>micu-1</i>    | <i>ju1156</i>        | CGCTCCGTTGATAAATCGAC...(1014bp deletion)...CGCTTTGAAGTTTTTCATGAC                |

**Table S2. Description of new alleles created in this study. Related to Figure 3 and 7.**
